# Supplementary material for: Multisensory correlations—Not tactile expectations—Determine the sense of body ownership
Source: PLoS One. 2019 Feb 28;14(2):e0213265. doi: 10.1371/journal.pone.0213265 (PMC6394992; doi:10.1371/journal.pone.0213265)
Supplement: S1 Data — Questionnaire, threat-evoked SCR, and continuous skin conductance and subjective ratings data. (XLSX) [file pone.0213265.s001.xlsx]

## Sheet: Questionnaire ratings
	Mean S1+S2				Mean S3+S4				Mean S5+S6				Mean S7+S8
Participant:	VT	V	HandApp	HandStat	VT	V	HandApp	HandStat	VT	V	HandApp	HandStat	VT	V	HandApp	HandStat
1	0	-3	-2.5	1	-3	-1.5	-0.5	1	-2.5	-2.5	-0.5	0	-1.5	-3	-1	-2.5
2	2.5	-3	-2.5	-3	0	-2	0.5	-2	3	-1.5	-1.5	-1	-2.5	-2.5	-2	-2
3	2.5	-3	-2.5	-3	0	-1	-3	-3	-0.5	1	-2.5	-2.5	-3	-3	-3	-2.5
4	-0.5	-2	-3	0	-2	-2	-2	0.5	-2.5	-1	-0.5	-0.5	-1	0	0	-1.5
5	-2.5	-0.5	-1	-2.5	-2.5	-2.5	-2	-1.5	-1.5	-1	-2	-2	-3	-2.5	-2.5	-2.5
6	0.5	-0.5	0	-2.5	1.5	1	-1	-0.5	1	0	0	1.5	-1.5	-1.5	0.5	0.5
7	2	1.5	2.5	2	2	2	3	2.5	2	2	2.5	2	-2	-2	-3	-2.5
8	1	-2	1	2	2	2	2	1.5	0.5	-0.5	0.5	0.5	0.5	1	0.5	-0.5
9	-2	-2	-0.5	-2.5	-1	-2	-0.5	-0.5	-0.5	-1.5	-0.5	-0.5	-2	-1.5	-2.5	-2
10	-1.5	-3	-2	-2.5	-2	-3	-1	-2.5	-2	-3	-3	-3	-3	-3	-3	-3
11	2	-1	-1	-1	-0.5	-3	-3	-3	1	-2.5	-2	-3	-2.5	-3	-3	-3
12	3	1.5	0.5	-1	1	-0.5	1	-2	2	0	0	0	-1	-1	-1	-1
13	1	1	-1	-0.5	1.5	1.5	-1.5	1	1	0.5	-1	0.5	-2	-1.5	-2.5	-2
14	-3	-3	-3	-3	-3	-3	-2	-3	0	-3	-2.5	-3	-3	-3	-3	-3
15	3	-3	0	-1	1	-2	1	0	2.5	0	-0.5	-0.5	0	-2.5	-0.5	-3
16	2.5	-1.5	-2	-3	2	-0.5	0.5	-1.5	3	0	0	-1.5	-3	-2.5	-1.5	-3
17	1.5	-1.5	-2	-3	-1	-0.5	-2	0	2.5	2	-1	-1	-1	-1.5	-1.5	-1.5
18	-1.5	-2.5	-3	-1.5	1	-3	-3	0	-1	-3	-3	-2	-2.5	-3	-3	-3
19	-1.5	1.5	2	2	-1	-2	-2.5	-2	-1.5	2	2.5	3	-2	-3	-3	-3
20	1	-2.5	1.5	0	-0.5	-0.5	0.5	0	-1.5	-2.5	0	1.5	-1.5	-3	-2.5	-3
21	2	-1.5	-1	-2	2	-2.5	-1	-0.5	2	-3	-2.5	-2	1.5	-2.5	-2	-1
22	3	-1	2.5	0.5	1.5	0	1.5	0.5	2	0	0.5	0.5	0	-0.5	-0.5	-0.5
23	3	2	2	1.5	-3	1	0	-0.5	3	1.5	2	-1	-3	-2	-2.5	-1
24	-0.5	-2	0	-3	0.5	-1.5	-2.5	-2.5	0	-0.5	-1.5	-1.5	0	-3	-3	-3
mean	0.729167	-1.29167	-0.625	-1.08333	-0.145833	-1.0625	-0.729167	-0.75	0.5	-0.6875	-0.6875	-0.645833	-1.625	-2.08333	-1.89583	-2.0625

## Sheet: Threat-evoked SCR
Participant:	VT	V	HandApp	HandStat
1	0.0638	0.0054	0.003	0.0106
2	0.2607	0.0323	0.0006	0.0221
3	0.0501	0.0056	0.0197	0.0031
4	0.255	0.0665	0.1497	0.0347
5	0.048	0.013	0.0034	0.0099
6	0.1119	0.0301	0.0042	0.0056
7	0.0339	0.0881	0.0111	0.0207
8	0.0691	0.2265	0.1082	0.0081
9	0.0734	0.093	0.0337	0.0366
10	0.0015	0.0122	0.0025	0.0007
11	0.0244	0.0185	0.0224	0.0035
12	0.0879	0.0107	0.034	0.0346
13	0.0345	0.0432	0.0212	0.0153
14	0.0306	0.0251	0.0234	0.0663
15	0.1375	0.0983	0.1862	0.0906
16	0.0745	0.0154	0.0546	0.198
17	0.0109	0.0173	0.0134	0.0187
18	0.1042	0.0705	0.0376	0.173
19	0.0045	0.0202	0.0713	0.0357
20	0.0588	0.0297	0.0086	0.0952
21	0.0912	0.0035	0.0057	0.0245
22	0.3265	0.3898	0.1426	0.0485
23	0.0202	0.0161	0.0545	0.0175
24	0.1263	0.0706	0.166	0.1499
mean	0.087475	0.0584	0.0490667	0.0468083

## Sheet: Skin conductance and ratings
		Visuotactile						Visual only - brush approaching						Visual only - hand approaching						Visual only - hand static
		55	45	35	25	15	5	55	45	35	25	15	5	55	45	35	25	15	5	55	45	35	25	15	5
GSR	P1	2.24780	2.23310	2.21230	2.19490	2.18290	2.17120	1.86810	1.85590	1.84720	1.84210	1.83760	1.83950	1.88180	1.87040	1.86980	1.86510	1.86250	1.86310	2.02140	2.00320	1.99140	1.98160	1.97580	1.96960
	P2	1.87070	1.86920	1.84840	1.83630	1.82520	1.81570	1.84250	1.83600	1.82410	1.81460	1.80750	1.80270	1.83540	1.82040	1.80840	1.79980	1.79330	1.78910	1.79460	1.78230	1.77350	1.76530	1.75770	1.75240
	P3	3.75350	3.74630	3.72760	3.71190	3.70130	3.69290	3.74330	3.72890	3.71120	3.70130	3.69260	3.68690	3.79970	3.78240	3.77790	3.77380	3.76700	3.76140	3.71510	3.70100	3.69100	3.68610	3.68130	3.67360
	P4	3.68430	3.73100	3.69730	3.64840	3.64010	3.61700	3.56090	3.50270	3.48800	3.46310	3.44600	3.43910	3.75220	3.65850	3.60430	3.64690	3.65790	3.65310	3.73280	3.69760	3.66510	3.64050	3.62270	3.60670
	P5	2.56350	2.55200	2.54260	2.53120	2.52310	2.51140	2.28480	2.27280	2.26220	2.25240	2.24190	2.23200	2.48950	2.50700	2.47920	2.45800	2.43610	2.42070	2.37480	2.35250	2.33540	2.31160	2.29130	2.27450
	P6	2.54500	2.51390	2.46320	2.46850	2.46250	2.44700	2.47690	2.39240	2.34580	2.33880	2.33070	2.30600	2.30390	2.22310	2.20030	2.19010	2.19370	2.21160	2.30490	2.25610	2.23050	2.20900	2.18390	2.17700
	P7	.78444	.78107	.76715	.76159	.75698	.75460	.70116	.69370	.68329	.68530	.68325	.68073	.72052	.72008	.72064	.71523	.71045	.70420	.68726	.67720	.68223	.67623	.67287	.66570
	P8	1.05530	1.05670	1.04040	1.03170	1.02790	1.00850	.74507	.74230	.73325	.73231	.72207	.71643	.80869	.79837	.79324	.78541	.78303	.77959	.68315	.68092	.68289	.66499	.67300	.66569
	P9	.88047	.87231	.87596	.86736	.86680	.86382	.95904	.95188	.94385	.94259	.93823	.93093	.90275	.88563	.87830	.86118	.84954	.87180	.88633	.87389	.87035	.86420	.85553	.85543
	P10	1.34900	1.33310	1.33420	1.32230	1.32620	1.32520	1.52430	1.47800	1.46090	1.44680	1.43640	1.42900	1.34580	1.30980	1.28070	1.26150	1.24970	1.24830	1.26000	1.24220	1.22900	1.21740	1.20540	1.19850
	P11	2.05620	2.06020	2.07060	2.06430	2.05200	2.05870	2.30140	2.28160	2.26530	2.25140	2.24410	2.23380	2.04350	2.03060	2.03090	2.02230	2.01630	2.00260	2.05990	2.04970	2.03360	2.02240	2.00990	2.00080
	P12	2.46650	2.43910	2.40210	2.37070	2.36490	2.35250	2.34500	2.33530	2.32180	2.30850	2.30480	2.28490	2.29290	2.28250	2.27160	2.26240	2.26200	2.26730	2.35380	2.33510	2.30750	2.29220	2.29140	2.27800
	P13	.90117	.91186	.92657	.92789	.92759	.91510	.84989	.80329	.79873	.81404	.81749	.82812	.80124	.79864	.83873	.89946	.89938	.88802	.84158	.77580	.81199	.80250	.82013	.79613
	P14	2.54930	2.61710	2.60920	2.62930	2.64220	2.37670	2.66520	2.66120	2.67470	2.64500	2.63670	2.67190	2.65710	2.58200	2.61580	2.58480	2.56770	2.53960	2.63090	2.65700	2.53960	2.69190	2.60080	2.48490
	P15	1.82280	1.84530	1.65700	1.73280	1.74710	1.78940	1.81930	1.80850	1.76070	1.80570	1.73800	1.75960	1.91260	1.93740	1.82260	1.86470	1.75460	1.78280	1.59280	1.61070	1.59850	1.59430	1.59740	1.59930
	P16	1.03300	1.05320	1.06270	1.04510	1.03680	1.01540	1.03520	1.03210	1.02310	1.01110	1.00440	1.00680	1.20160	1.17680	1.15230	1.14000	1.12110	1.10770	.92340	.93212	.92331	.91907	.91512	.90719
	P17	2.30640	2.30020	2.28690	2.28760	2.27190	2.26470	2.28200	2.32840	2.34050	2.32470	2.31710	2.31620	2.55710	2.55490	2.53410	2.53320	2.53120	2.53620	2.41900	2.39620	2.39280	2.37090	2.37030	2.38720
	P18	1.67160	1.74240	1.70080	1.65010	1.59270	1.53220	1.47260	1.48110	1.47220	1.46770	1.45580	1.45450	1.63020	1.65280	1.63600	1.59700	1.60440	1.63390	1.90090	1.88370	1.87680	1.84580	1.81990	1.78420
	P19	.93242	.94183	.96701	.97197	.97020	.96861	.88848	.90694	.90890	.90757	.90121	.90994	.86372	.85342	.84153	.83827	.82382	.80906	.90357	.89435	.87731	.86664	.85888	.85745
	P20	2.04950	2.02910	2.03670	2.06750	2.01140	2.00270	1.40850	1.36230	1.37910	1.38200	1.40330	1.39990	2.03880	2.07520	2.15450	2.09900	2.15260	2.14950	1.95080	1.91250	1.84780	1.83560	1.81230	1.84320
	P21	1.07290	1.08280	1.07260	1.06000	1.05420	1.05690	.75806	.75654	.75656	.75639	.75548	.75454	.95844	.96741	.97672	.98882	.99162	1.00210	.93952	.92352	.91804	.92649	.92126	.91795
	P22	2.66640	2.79290	2.66240	2.60840	2.57420	2.54680	2.63850	2.58910	2.55680	2.53720	2.52320	2.50720	2.48270	2.46540	2.46620	2.42310	2.39600	2.37790	2.49000	2.44010	2.41300	2.39630	2.46420	2.41950
	P23	2.18570	2.19290	2.18280	2.15010	2.14250	2.14040	2.10810	2.09280	2.07570	2.06480	2.07070	2.07800	2.39570	2.35710	2.32950	2.33270	2.34960	2.34550	2.18410	2.16330	2.16320	2.17560	2.16690	2.15810
	P24	2.33230	2.40000	2.35960	2.32060	2.29990	2.29890	2.27480	2.25530	2.23650	2.22520	2.21720	2.21280	2.52000	2.50790	2.50680	2.47850	2.45340	2.44960	2.30570	2.27420	2.24950	2.23730	2.21770	2.20480
		Visuotactile						Visual only - brush approaching						Visual only - hand approaching						Visual only - hand static
		55	45	35	25	15	5	55	45	35	25	15	5	55	45	35	25	15	5	55	45	35	25	15	5
Real-time ratings (given in 0-5 mV, which represents -3 to +3 in rating)	P1	.2120600	2.5328000	4.2707000	4.7135000	4.8826000	4.920600	.0015528	.0015578	.0015536	.0015354	.0015176	.0015448	.0015300	.0015414	.0015748	.0015521	.0219850	.2920700	.0014433	.3169700	.6350800	.7738700	.7763900	.6724900
	P2	.4411200	1.4316000	2.9668000	3.7263000	4.3643000	4.827800	.0015228	.0015316	.0015406	.0015357	.0015288	.0015086	.0039303	.0015461	.0015358	.0015382	.0015370	.0015261	.0015735	.0014831	.0015102	.0015369	.0015543	.0015497
	P3	.0017523	.0015355	.0033096	.0505710	.1137200	.396590	.0015740	.0015273	.0015367	.0015109	.0015319	.0015486	.0103600	.0015400	.0015334	.0015299	.0015318	.0015478	.0015745	.0015873	.0014704	.0014828	.0013926	.0014415
	P4	.0013310	.1459000	.5070400	.5431800	.5435400	.685090	.0013165	.0013422	.0013270	.0707210	.1006500	.1344100	.0013339	.0013337	.0013178	.0013402	.0013479	.0013379	.0013172	.0013366	.0013439	.0013304	.0012238	.0012951
	P5	.0254060	.5313400	.7541000	.7621100	.7617800	.761670	.0012816	.0012849	.0013009	.0012837	.0012963	.0750750	.0012979	.0012950	.0012975	.0012980	.0012975	.0475690	.0012697	.0013953	.0030194	.0012718	.0012071	.0012302
	P6	.1543400	.9707300	1.5292000	1.8642000	2.2116000	2.934500	.0015278	.0015287	.0015229	.0182590	.1135700	.2951700	.0015229	.0015435	.0617980	.6319400	1.2859000	1.7774000	.0015377	.0015377	.0015390	.0016039	.0015710	.0015388
	P7	.2851800	1.1036000	1.9508000	2.4896000	3.3622000	4.250900	.1800200	.8125100	1.4753000	2.1649000	2.9180000	3.7948000	.1461200	.9840900	1.8338000	3.0684000	4.1381000	4.6437000	2.1768000	3.0144000	3.2383000	3.3136000	3.3328000	3.3466000
	P8	.3974000	1.0029000	1.2819000	1.7265000	2.5947000	2.934300	.0013127	.0156550	.4754400	.9104800	1.1478000	1.3495000	.0671700	.3379000	.4607700	.9168100	1.2131000	1.3183000	.0149790	.4497400	.7080400	.7432500	.7642400	.7740400
	P9	.0015572	.0015548	.0015606	.0016999	.0400360	.338500	.0015442	.0015495	.0015286	.0015565	.0015654	.0015727	.0015736	.0015569	.0239030	.0934600	.2816800	.3915000	.0015324	.0016525	.0015581	.0014876	.0015027	.0016374
	P10	.0015796	.0015789	.0015618	.0027103	.2145500	.465260	.0015686	.0015661	.0015681	.0015619	.0015505	.0015781	.0015651	.0015463	.0015679	.0015703	.0015542	.0015745	.0015580	.0015008	.0015635	.0016196	.0015814	.0015579
	P11	.8278500	2.5706000	3.1990000	3.3773000	3.5210000	3.690200	.0015538	.0015401	.0015574	.0015399	.0015516	.0284100	.0015501	.0015723	.0015483	.0015528	.0015537	.0015234	.0015421	.0014729	.0014840	.0016165	.0014989	.0015094
	P12	1.0213000	3.2788000	2.9496000	3.1517000	3.7883000	4.391200	.0015456	.3835000	1.1422000	1.2478000	1.3383000	1.9561000	.0021357	.0015559	.0930240	.4268500	.5120900	.6407500	.0016288	.0015281	.0014887	.0015704	.0015449	.0015110
	P13	.0091753	.1692000	.4357600	.6038300	.9794300	1.601200	.0015763	.0015601	.0015640	.0039358	.0323070	.3472300	.0015577	.0015419	.0015455	.0015447	.0015508	.0095978	.0645560	.1735500	.2385800	.2931400	.3869300	.4464700
	P14	.0015398	.0015518	.0015548	.0015483	.0015579	.001553	.0015518	.0015506	.0015635	.0015289	.0015449	.0434120	.0015754	.0015536	.0015481	.0015276	.0065437	.0327850	.0015428	.0014752	.0016017	.0280170	.1980300	.2701800
	P15	1.1897000	3.6478000	3.9441000	4.4904000	4.8141000	4.888400	.0022872	.0914770	.6072400	1.1735000	1.7948000	2.8587000	.0015526	.0015517	.0240980	.2445900	.7552700	1.4292000	.1406300	.4032500	.7356600	.6836000	.5507600	.3692700
	P16	1.2609000	3.7364000	4.1879000	4.7325000	4.7788000	4.907700	.0015644	.0015497	.0015772	.0015602	.0015707	.0029083	.0015628	.0015671	.0015506	.0015686	.0015534	.0015549	.0014270	.0015276	.0015364	.0015260	.0014831	.0016374
	P17	.0015668	.0030208	.9388500	1.5296000	2.5123000	2.603000	.0015841	.0015625	.0015728	.0015632	.0015549	.0983660	.0015546	.0015534	.0015469	.0015718	.0091239	.2266000	.0015411	.0015518	.0014896	.0014766	.0015563	.0016141
	P18	.6624800	4.6729000	4.9472000	4.9973000	4.8776000	4.886200	.0015542	.0015605	.0015658	.0015612	.0015524	.0015408	.0015164	.0015479	.0015550	.0015409	.0015770	.0015207	.0015498	.0016065	.0014660	.0015547	.0015938	.0015532
	P19	.0015868	.9757700	1.5041000	1.9092000	3.6719000	4.458800	.0015274	.0015489	.0015581	.0015506	.0701370	.7882300	.0015680	.0015475	.1074200	1.4461000	2.2507000	3.2232000	.1873700	.8214700	1.8208000	1.8783000	1.8894000	1.8981000
	P20	.0556360	1.2615000	2.1580000	2.2975000	3.0371000	3.851700	.0015210	.0015453	.0554890	.0373920	.0655220	.1808400	.0015465	.0015573	.0015670	.0435980	.2164400	.8176600	.1744200	.2741400	.2459200	.4095600	.3917100	.3787300
	P21	.8812100	4.8699000	5.0228000	5.0228000	5.0229000	5.022800	.0015118	.0014951	.0015165	.0014984	.0015084	.0014963	.0014968	.0015037	.0015033	.0014968	.0015065	.0015018	.0014729	.0015106	.0015399	.0015624	.0014717	.0014334
	P22	.6084000	4.2657000	5.0193000	5.0234000	5.0233000	4.814900	.0015581	.0015674	.0015604	.0015823	.0015674	.0824320	.0015563	.0015641	.0015630	.0015468	.0015390	.0433620	.0014857	.0015536	.2659300	.2282200	.4004700	.2952400
	P23	.0162730	2.2380000	4.2462000	4.4015000	4.9255000	5.023300	.0015479	.0015446	.0210790	1.0660000	3.0181000	3.2896000	.0015475	.0015398	.0047024	1.7238000	3.2802000	3.6511000	.0016207	.1818500	1.6720000	2.4904000	2.5927000	2.5924000
	P24	1.0676000	4.9840000	5.0232000	5.0232000	5.0232000	5.023200	.0049525	.5909300	1.8822000	2.8546000	3.6679000	4.1413000	.0015123	.2208200	1.9366000	2.9804000	3.7671000	4.6969000	.0015400	.0014905	.0016180	.0015600	.0015406	.0014994
